# Supplementary material
Source: HighWire-hosted journal article supplement (https://www.cfp.ca/highwire/filestream/32043/field_highwire_adjunct_files/5/354_RolesExpertiseDisclosure.pdf)
Supplement: 354_RolesExpertiseDisclosure.pdf [file 354_RolesExpertiseDisclosure.pdf]

**Appendix 1. Expertise, roles and responsibilities, and conflicts of interest for the guideline development team members and support staff**

| <b>Name</b>                               | <b>Expertise</b>                                                                                 | <b>Guideline Role and Section Responsibilities</b>                                                                                                                                  | <b>Conflict(s) of Interest</b>                                                                                                                                                                                                                                                                                                                                          |
|-------------------------------------------|--------------------------------------------------------------------------------------------------|-------------------------------------------------------------------------------------------------------------------------------------------------------------------------------------|-------------------------------------------------------------------------------------------------------------------------------------------------------------------------------------------------------------------------------------------------------------------------------------------------------------------------------------------------------------------------|
| <b>Guideline development team members</b> |                                                                                                  |                                                                                                                                                                                     |                                                                                                                                                                                                                                                                                                                                                                         |
| Barbara Farrell                           | Pharmacist (Geriatric Day Hospital, lead on the Deprescribing guidelines in the elderly project) | <ul style="list-style-type: none"> <li>• Overall lead</li> <li>• Introduction</li> <li>• Recommendations</li> <li>• Clinical considerations</li> <li>• Gaps in knowledge</li> </ul> | Received research funding for the purposes of developing this guideline; received financial payments from Institute for Healthcare Improvement and Commonwealth Fund for deprescribing guidelines summary and from Ontario Long-Term Care Physicians Association, Ontario Pharmacists Association and Canadian Society of Hospital Pharmacists for speaking engagements |
| Kevin Pottie                              | Family Physician, WHO GRADE working group member                                                 | <ul style="list-style-type: none"> <li>• GRADE methods lead</li> <li>• Recommendations</li> </ul>                                                                                   | None declared                                                                                                                                                                                                                                                                                                                                                           |
| Carlos Rojas-Fernandez                    | Pharmacist (geriatrics, primary and long-term care settings)                                     | <ul style="list-style-type: none"> <li>• Review of harms</li> <li>• Clinical considerations</li> <li>• Other guidelines</li> </ul>                                                  | None declared                                                                                                                                                                                                                                                                                                                                                           |
| Kate Walsh                                | Pharmacist (completed residency project on PPI deprescribing)                                    | <ul style="list-style-type: none"> <li>• Patient values and preferences</li> <li>• Resource implications</li> </ul>                                                                 | None declared                                                                                                                                                                                                                                                                                                                                                           |
| Paul Moayyedi                             | Gastroenterologist – Cochrane GI group member                                                    | <ul style="list-style-type: none"> <li>• GRADE review</li> </ul>                                                                                                                    | Chair partially funded by Astra Zeneca; received financial payments from same for speaking engagements.                                                                                                                                                                                                                                                                 |
| <b>Support persons</b>                    |                                                                                                  |                                                                                                                                                                                     |                                                                                                                                                                                                                                                                                                                                                                         |
| Wade Thompson                             | Pharmacist (Long-term care)                                                                      | <ul style="list-style-type: none"> <li>• Summary of findings</li> </ul>                                                                                                             | None declared                                                                                                                                                                                                                                                                                                                                                           |

|                   |                                                  |                                                                                                                                               |               |
|-------------------|--------------------------------------------------|-----------------------------------------------------------------------------------------------------------------------------------------------|---------------|
|                   |                                                  | <ul style="list-style-type: none"> <li>• GRADE review</li> <li>• Patient values and preferences</li> <li>• Clinical considerations</li> </ul> |               |
| Taline Boghossian | Pharmacy resident – to conduct systematic review | <ul style="list-style-type: none"> <li>• Summary of findings</li> <li>• Gaps in knowledge</li> </ul>                                          | None declared |
| Farah Joy Rashid  | Pharmacy resident – to conduct systematic review | <ul style="list-style-type: none"> <li>• Summary of findings</li> <li>• Gaps in knowledge</li> </ul>                                          | None declared |
| Vivian Welch      | Clinical epidemiology methodologist              | <ul style="list-style-type: none"> <li>• Summary of findings</li> <li>• GRADE review</li> <li>• Gaps in knowledge</li> </ul>                  | None declared |
| Lisa Pizzola      |                                                  | <ul style="list-style-type: none"> <li>• Guideline coordinator</li> </ul>                                                                     | None declared |
